# Supplementary material for: Radical metallacyclopropene: synthesis, structure and aromaticity
Source: Royal Society of Chemistry journal article supplement (doi:10.1039/d3dt01558k), 2023-01-01
Supplement: d3dt01558k1.pdf [file d3dt01558k1.pdf]

## Radical metallacyclopropene: synthesis, structure and aromaticity

Wei Bai,<sup>\*a</sup> Lei Li,<sup>a</sup> Yukang Fu,<sup>b</sup> Junping Tang,<sup>a</sup> Yue Zhao,<sup>a</sup> Yilun Wang,<sup>b</sup> and Yang Li <sup>\*b</sup>

<sup>a</sup> School of Chemistry, Dalian University of Technology, Liaoning 116024, P.R. China

<sup>b</sup> School of Chemical Engineering, Dalian University of Technology, Panjin, Liaoning 124221, P.R.  
China

### Supporting Information

#### Table of Contents

|                                                             |                |
|-------------------------------------------------------------|----------------|
| <b>1. HRMS, NMR, and EPR spectra</b>                        | <b>S2-S7</b>   |
| <b>3. Computational details</b>                             | <b>S8-S9</b>   |
| <b>4. X-ray crystallographic study of complexes 1 and 4</b> | <b>S10</b>     |
| <b>5. The calculated Cartesian coordinates</b>              | <b>S11-S13</b> |
| <b>Reference</b>                                            | <b>S14</b>     |

## 2. HRMS, NMR, and EPR Spectra

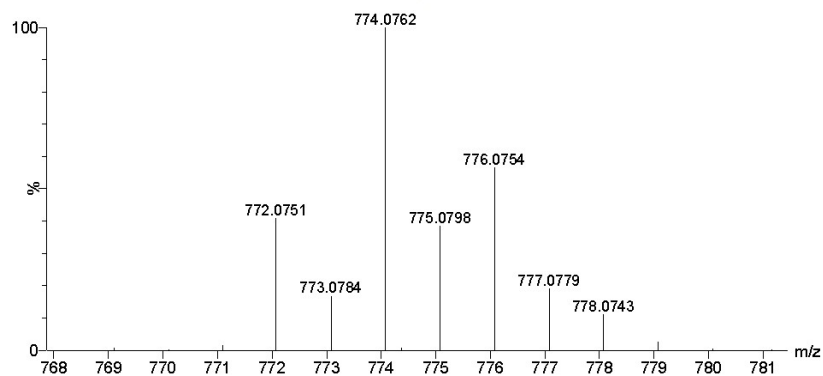

**Figure S1.** The HRMS result of complex 1.

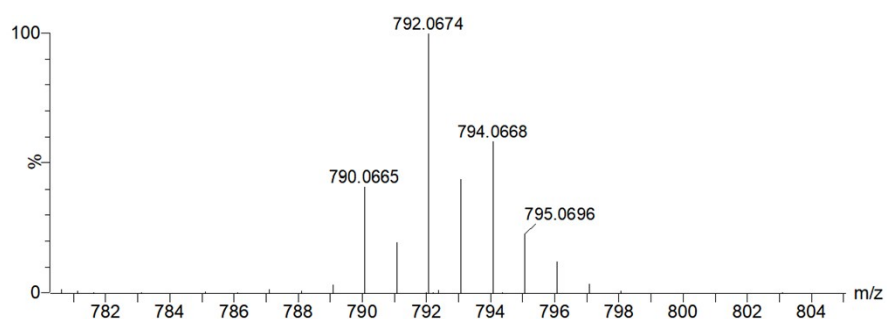

**Figure S2.** The HRMS result of complex 2.

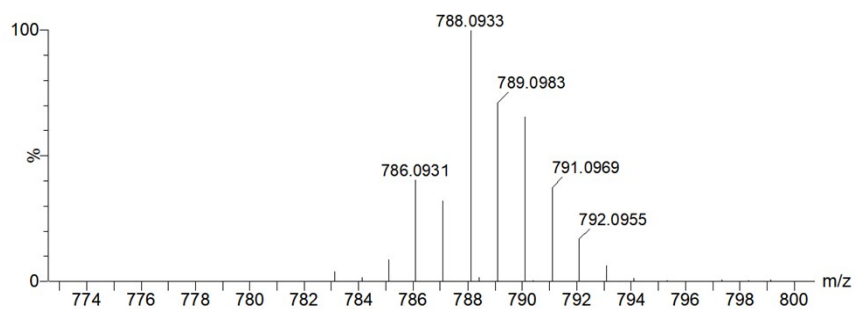

**Figure S3.** The HRMS result of complex 3.

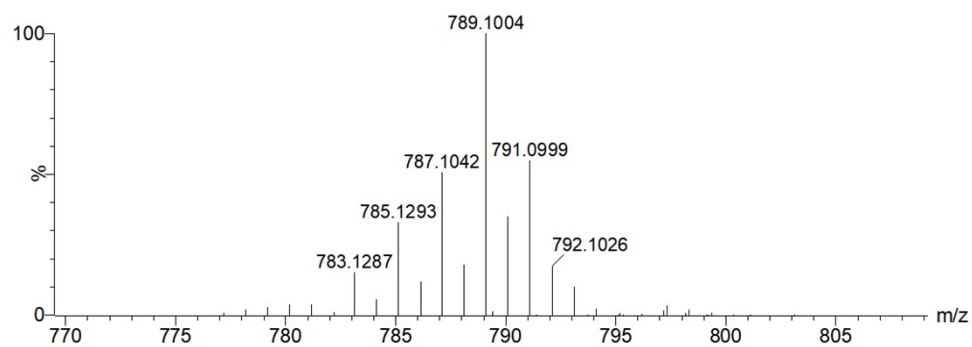

**Figure S4.** The HRMS result of complex 6.

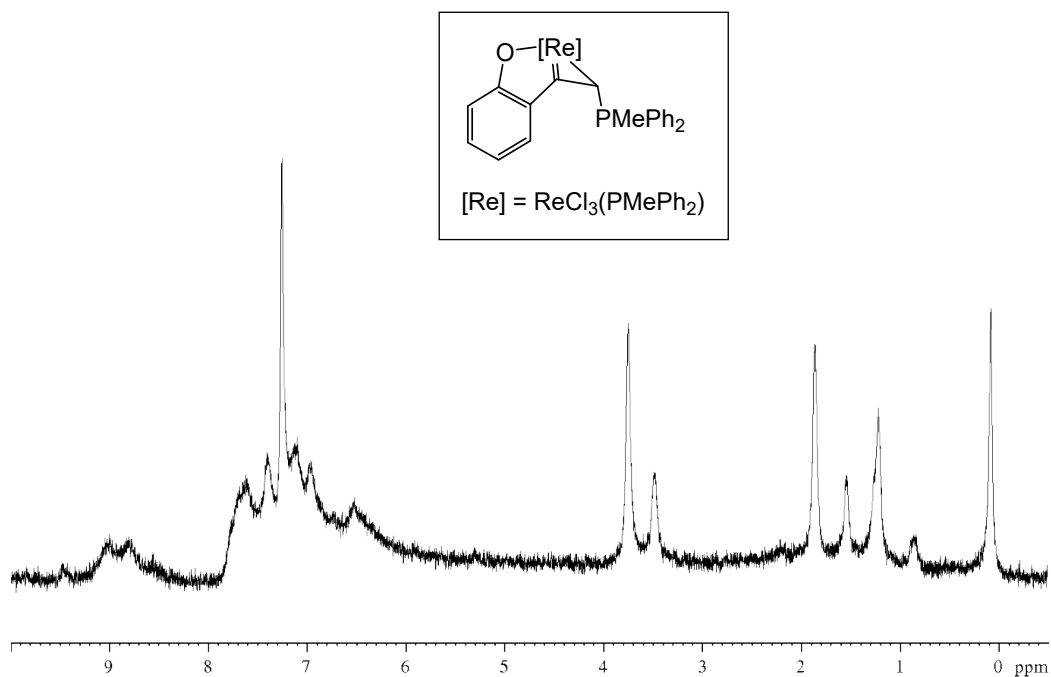

**Figure S5.** The  $^1\text{H}$  NMR spectrum of complex **1** in  $\text{CDCl}_3$  at 400.1 MHz.

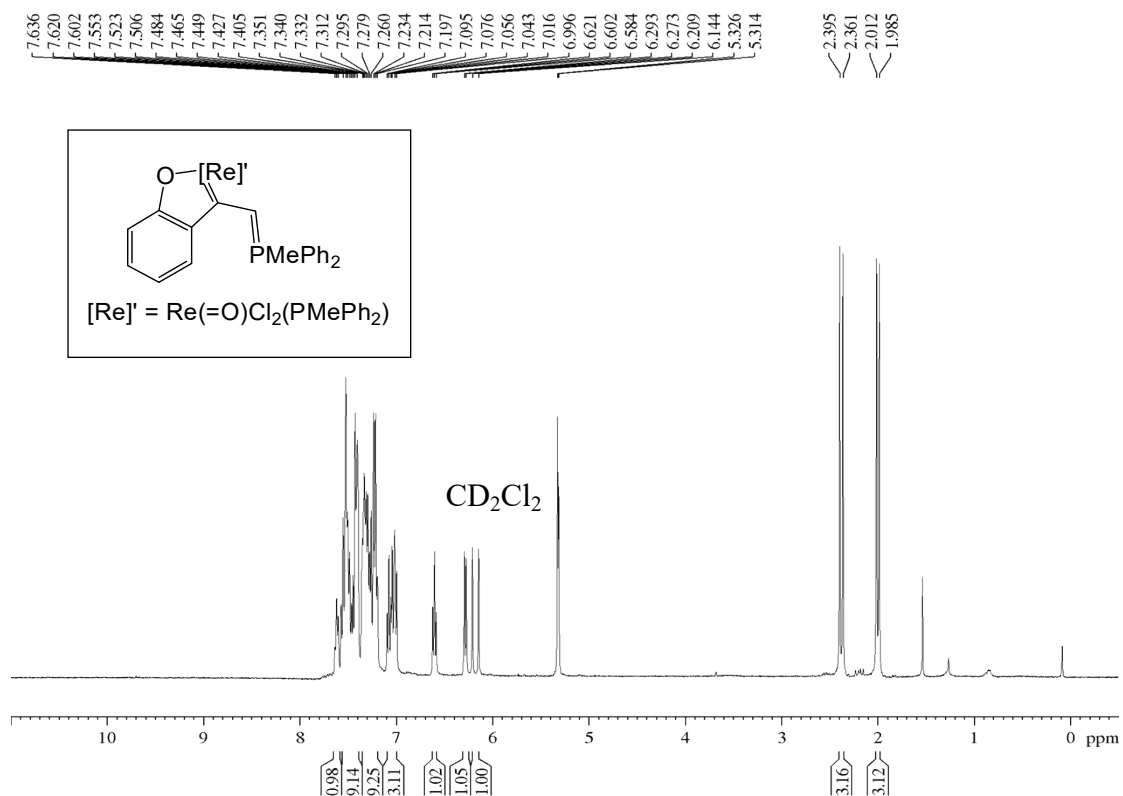

**Figure S6.** The  $^1\text{H}$  NMR spectrum of complex **4** in  $\text{CD}_2\text{Cl}_2$  at 400.1 MHz.

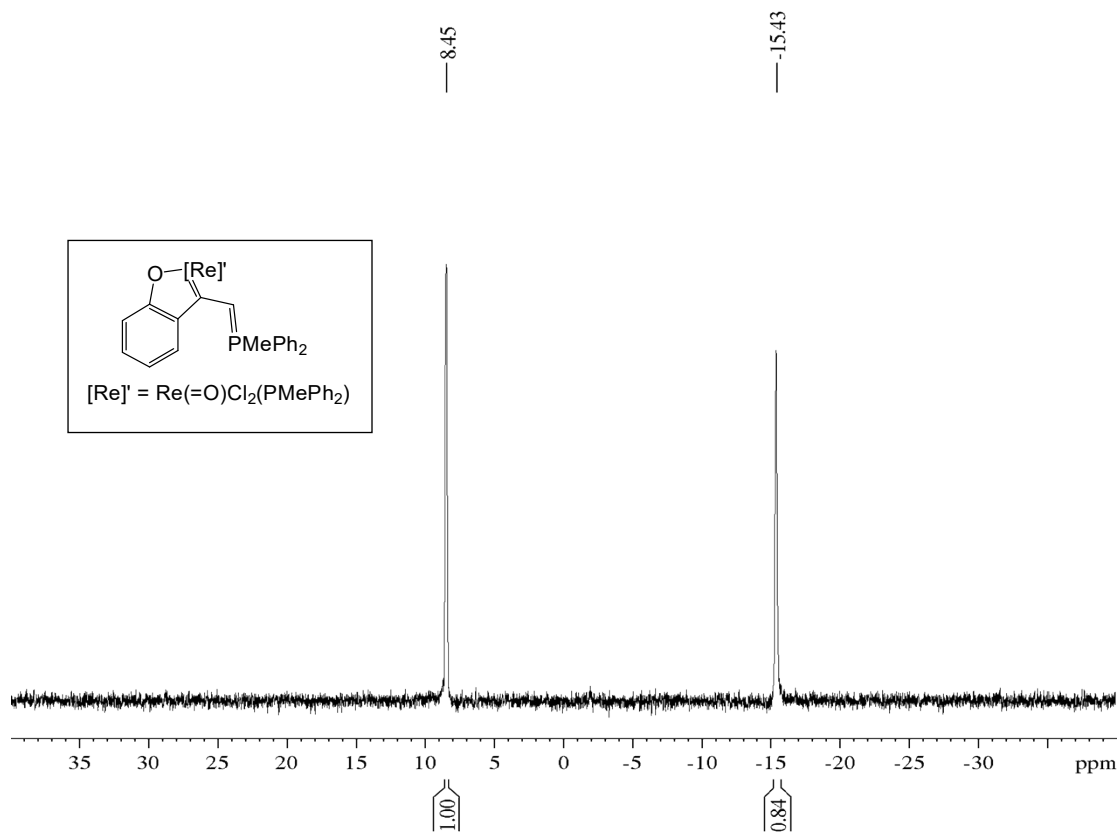

**Figure S7.** The  $^{31}\text{P}$   $\{^1\text{H}\}$  NMR spectrum of complex **4** in  $\text{CD}_2\text{Cl}_2$  at 162.0 MHz.

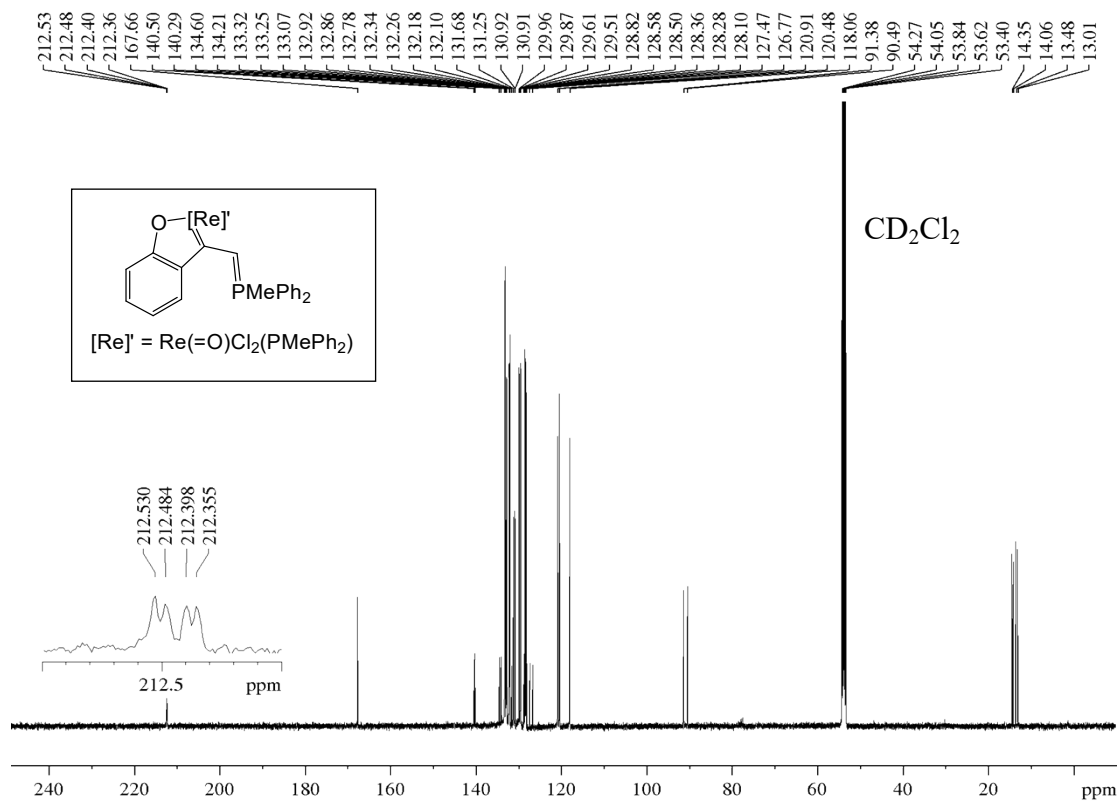

**Figure S8.** The  $^{13}\text{C}$   $\{^1\text{H}\}$  NMR spectrum of complex **4** in  $\text{CD}_2\text{Cl}_2$  at 125.0 MHz.

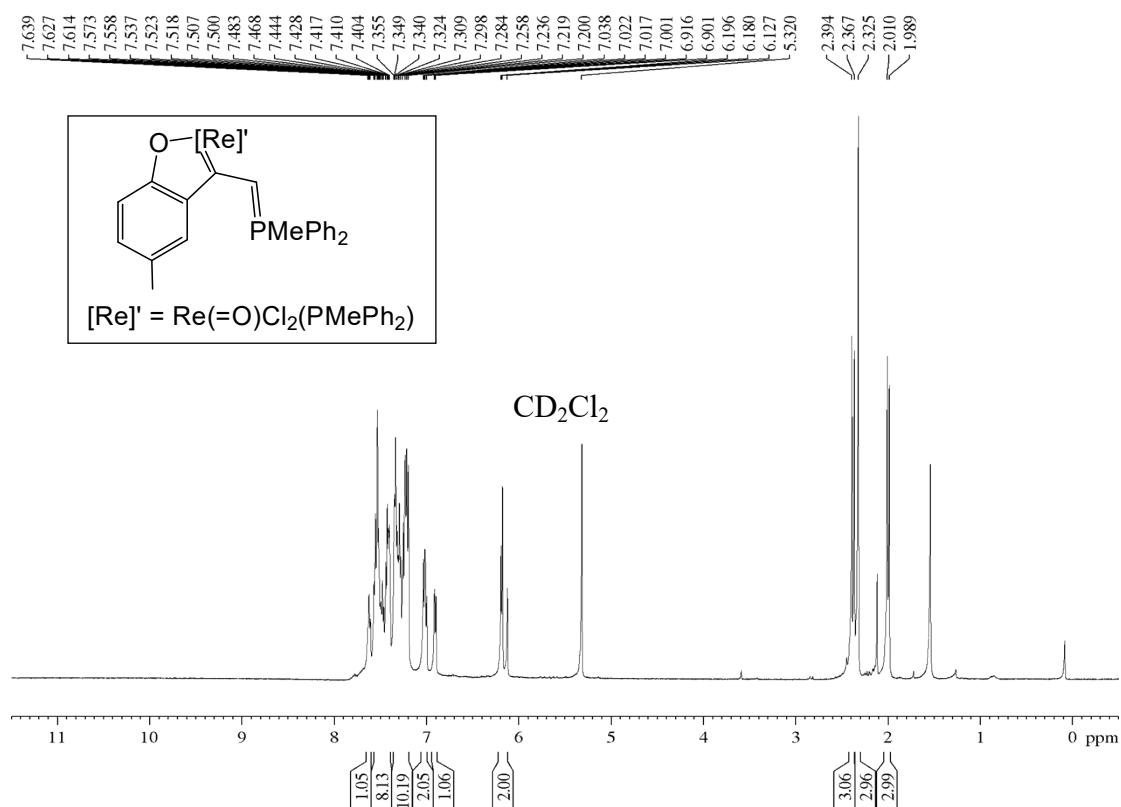

**Figure S9.** The <sup>1</sup>H NMR spectrum of complex **5** in CD<sub>2</sub>Cl<sub>2</sub> at 400.1 MHz.

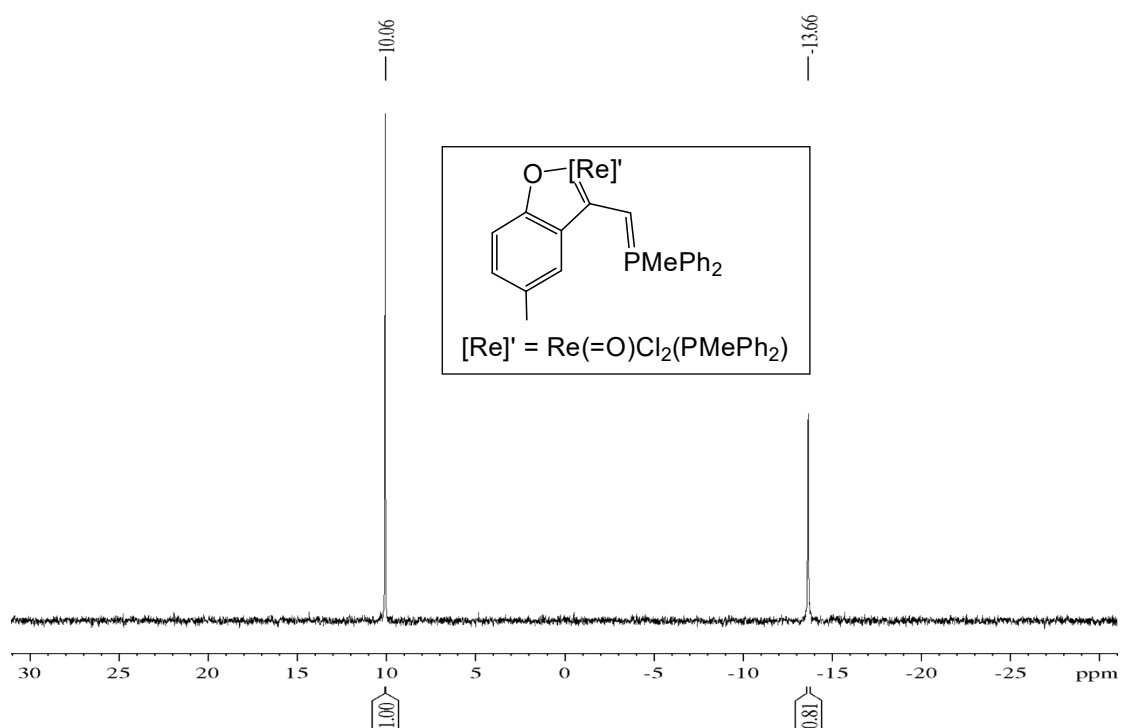

**Figure S10.** The <sup>31</sup>P {<sup>1</sup>H} NMR spectrum of complex **5** in CD<sub>2</sub>Cl<sub>2</sub> at 162.0 MHz.

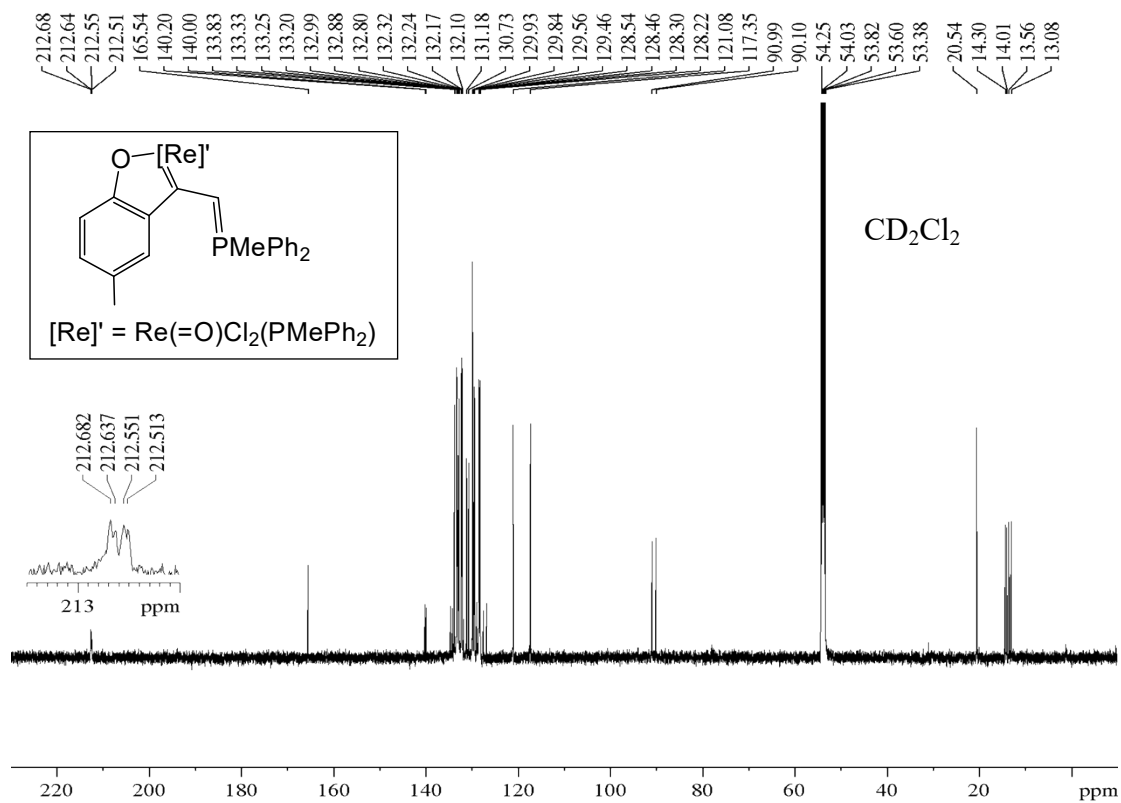

**Figure S11.** The  $^{13}\text{C}$   $\{^1\text{H}\}$  NMR spectrum of complex **5** in  $\text{CD}_2\text{Cl}_2$  at 125.0 MHz.

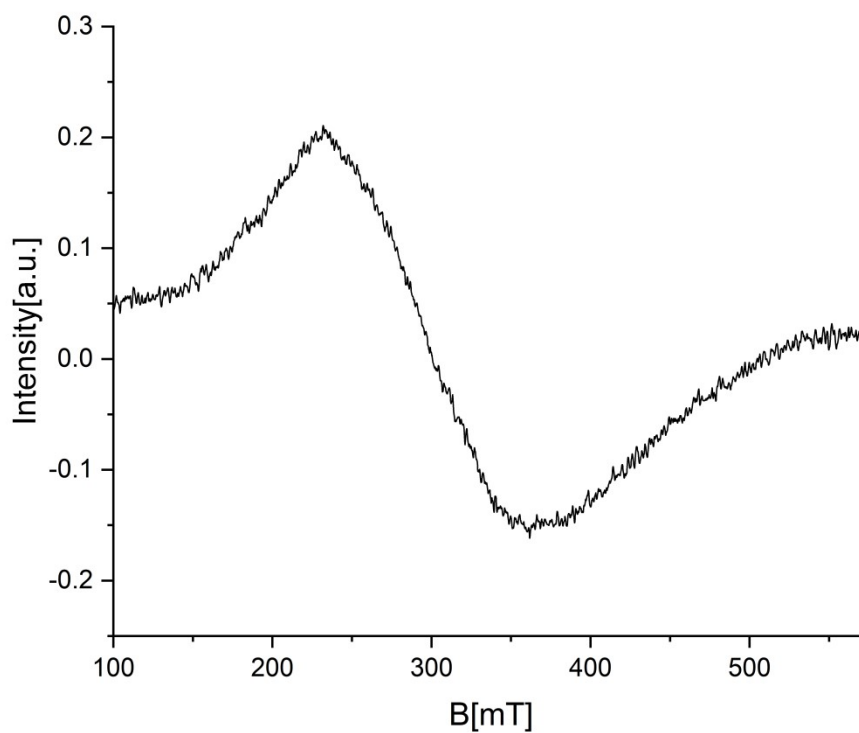

**Figure S12.** The EPR spectrum of complex **2** (powder) at room temperature.

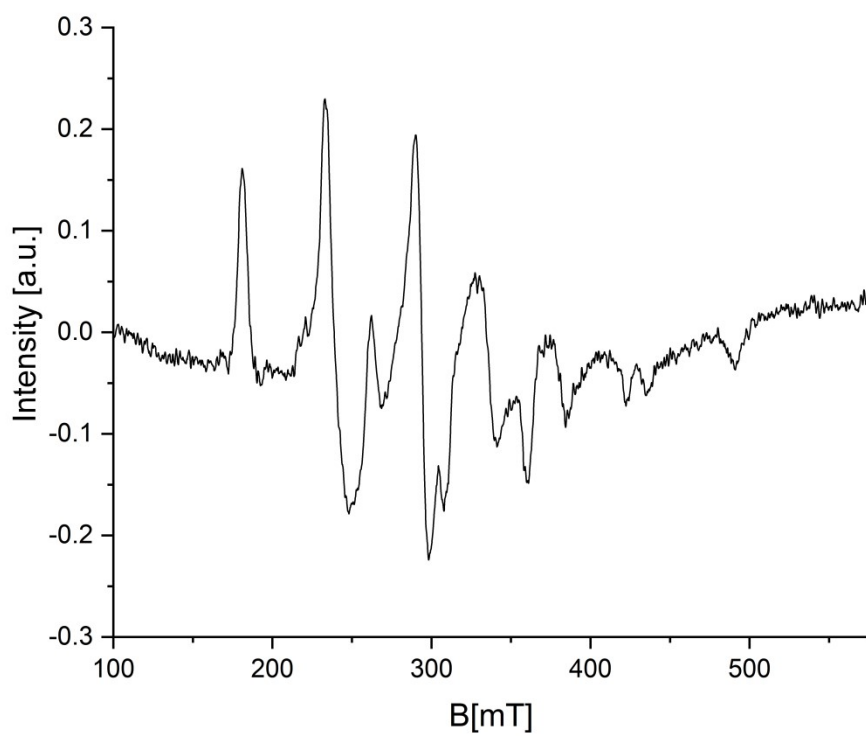

**Figure S13.** The EPR spectrum of complex **6** (powder) at room temperature.

## 2. Computational Details

All the optimizations were performed with the Gaussian 16 software package.<sup>1</sup> The structures evaluated were optimized at the B3LYP level of density functional theory (DFT).<sup>2</sup> DFT/GENECP level had been done by implementing def2-TZVP basis set for Re atom,<sup>3</sup> while 6-311G(2d,p) basis set had been used for the rest of atoms.<sup>4</sup> Nucleus-independent chemical shift (NICS) values were calculated at the B3LYP-GIAO//6-311G(2d,p)/def2-TZVP level.<sup>5</sup> The anisotropy of the current density was calculated with the AICD 2.0 program computing the NMR properties using the CSGT method with the Gaussian16 with the geometries previously obtained.<sup>6</sup> GIMIC analysis was finished by GIMIC code <sup>7</sup> based on the formatted check point file of Gaussian. Using RunEDDB script,<sup>8</sup> electron density of delocalized bond (EDDB) <sup>9</sup> based on natural atomic orbitals (NAOs) is analyzed.

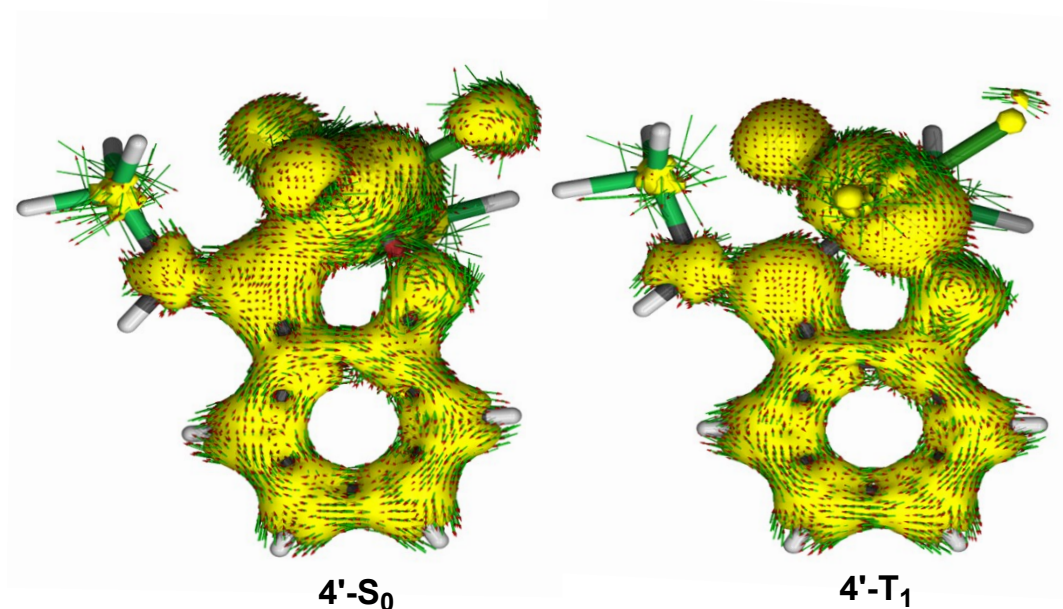

*Figure S14.* The AICD plots of  $4'$ . The isovalue for the surface is 0.050 a.u.



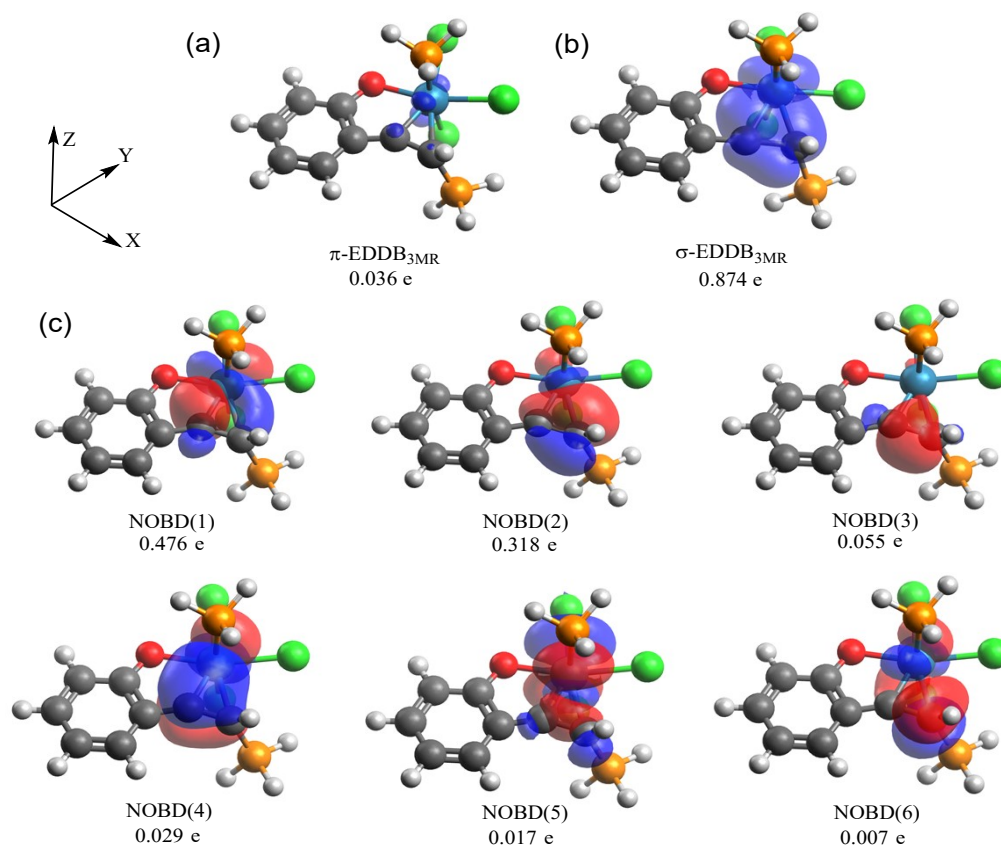

**Figure S15.** EDDB\_F(r) results for the 3MR in **1'** and key NOBDs of the ring. Isovalues is 0.001 for  $\pi$ -EDDB and  $\sigma$ -EDDB, Isovalue for NOBD contours is 0.040.

### 3. X-ray crystallographic study of complexes 1 and 4

**Table S1.** Crystallographic data and refinement details for **1** and **4**

|                                                    | <b>1</b>                                                                                             | <b>4</b>                                                                         |
|----------------------------------------------------|------------------------------------------------------------------------------------------------------|----------------------------------------------------------------------------------|
| Empirical formula                                  | C <sub>34</sub> H <sub>31</sub> Cl <sub>3</sub> OP <sub>2</sub> Re • C <sub>4</sub> H <sub>8</sub> O | C <sub>34</sub> H <sub>31</sub> Cl <sub>2</sub> O <sub>2</sub> P <sub>2</sub> Re |
| Color & habit                                      | dark brown, block                                                                                    | orange, block                                                                    |
| Crystal size (mm <sup>3</sup> )                    | 0.10 x 0.08 x 0.06                                                                                   | 0.10 x 0.06 x 0.02                                                               |
| Temperature (K)                                    | 150K                                                                                                 | 150K                                                                             |
| Crystal system                                     | orthorhombic                                                                                         | triclinic                                                                        |
| Space group                                        | <i>P2<sub>1</sub>2<sub>1</sub>2<sub>1</sub></i>                                                      | <i>P-1</i>                                                                       |
| a(Å)                                               | 11.0621(2)                                                                                           | 10.5704(4)                                                                       |
| b(Å)                                               | 18.0532(4)                                                                                           | 11.4035(5)                                                                       |
| c(Å)                                               | 18.0532(4)                                                                                           | 13.9505(6)                                                                       |
| α/°                                                | 90                                                                                                   | 107.3720(10)                                                                     |
| β/°                                                | 90                                                                                                   | 92.398(2)                                                                        |
| γ/°                                                | 90                                                                                                   | 106.532(2)                                                                       |
| V(Å <sup>3</sup> ), Z                              | 3605.34(13), 4                                                                                       | 1523.69(11), 2                                                                   |
| D <sub>cal</sub> (Mg/m <sup>3</sup> )              | 1.492                                                                                                | 1.723                                                                            |
| Abs. coeff.(mm <sup>-1</sup> )                     | 3.705                                                                                                | 4.299                                                                            |
| 2θ range for data collection (°)                   | 4.318 to 52.732                                                                                      | 3.088 to 52.828                                                                  |
| Reflections collected                              | 40698                                                                                                | 17755                                                                            |
| Indep. Reflection, R(int)                          | 7399, 0.0419                                                                                         | 6197, 0.0408                                                                     |
| Data/ restraints / parameters                      | 7399/6/373                                                                                           | 6197/6/366                                                                       |
| Goodness-of-fit on F <sup>2</sup>                  | 1.045                                                                                                | 1.086                                                                            |
| R1 [I>2σ(I)], wR2                                  | 0.0296, 0.0727                                                                                       | 0.0398, 0.1033                                                                   |
| R1 (all data), wR2                                 | 0.0346, 0.0747                                                                                       | 0.0441, 0.1063                                                                   |
| Largest diff. peak and hole (e • Å <sup>-3</sup> ) | 0.51, -0.45                                                                                          | 4.82, -2.01                                                                      |

#### 4. The Calculated Cartesian Coordinates with Electronic Energies

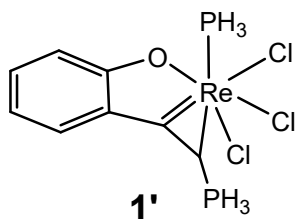

**0 2**

**E = -2528.678738 a.u.**

|    |             |             |             |
|----|-------------|-------------|-------------|
| Re | -0.59266201 | -0.22386859 | -0.04024686 |
| Cl | -2.87196421 | 0.46292042  | 0.57617106  |
| Cl | -0.68420812 | 1.11522143  | -2.05829002 |
| Cl | -1.57043176 | -2.14332297 | -1.12793139 |
| O  | 1.10172410  | -1.25526133 | -0.66039401 |
| C  | 0.91735183  | 0.74713859  | 0.65772730  |
| C  | 2.27490759  | -0.76528196 | -0.34053365 |
| C  | -0.09794420 | 1.64188433  | 1.05933993  |
| H  | -0.45358660 | 1.70739020  | 2.08469406  |
| C  | 2.26045925  | 0.42955936  | 0.43296805  |
| C  | 3.46260810  | 1.05063591  | 0.82276396  |
| H  | 3.44185318  | 1.95826118  | 1.41511341  |
| C  | 4.65562754  | 0.47717647  | 0.44238881  |
| H  | 5.59506165  | 0.93419690  | 0.72683557  |
| C  | 3.50086895  | -1.34179667 | -0.71120085 |
| H  | 3.51021975  | -2.24937670 | -1.30068230 |
| C  | 4.66504418  | -0.71138327 | -0.31876490 |
| H  | 5.61868475  | -1.13964624 | -0.60557110 |
| P  | -0.50307991 | 3.12524001  | 0.16495980  |
| H  | -1.79317845 | 3.14760045  | -0.36926284 |
| H  | -0.48846130 | 4.20938421  | 1.06241322  |
| H  | 0.39687319  | 3.51056507  | -0.82612754 |
| P  | -0.84028127 | -1.69451446 | 1.90225727  |
| H  | 0.06335633  | -2.76725416 | 2.00117805  |
| H  | -0.71268743 | -1.14905761 | 3.19626920  |
| H  | -2.07312914 | -2.35022937 | 2.01127520  |

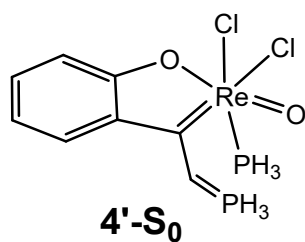

0 1

E = -2143.705834 a.u.

|    |             |             |             |
|----|-------------|-------------|-------------|
| Re | 0.80962315  | -0.23776949 | 0.00090975  |
| Cl | 2.10083754  | -2.21255190 | -0.49475676 |
| Cl | 1.08657453  | 0.49287964  | -2.25574673 |
| O  | -0.79361276 | -1.37897880 | -0.41157389 |
| O  | 1.79730943  | 0.93732252  | 0.75657056  |
| C  | -0.80740041 | 1.11925024  | 0.19111493  |
| C  | -2.02090853 | -0.87065502 | -0.31014117 |
| C  | -2.11184296 | 0.49530705  | 0.01850880  |
| C  | -3.38010083 | 1.08229680  | 0.12222560  |
| H  | -3.47743973 | 2.13349280  | 0.36707575  |
| C  | -4.40627321 | -1.03448115 | -0.40948660 |
| H  | -5.30313361 | -1.61947491 | -0.57724989 |
| C  | -3.16644005 | -1.64171008 | -0.52129092 |
| H  | -3.06250294 | -2.68800472 | -0.77826614 |
| C  | -4.51843602 | 0.32300228  | -0.08619477 |
| H  | -5.49743363 | 0.77845494  | -0.00371193 |
| C  | -0.69194355 | 2.46772183  | 0.40758207  |
| H  | -1.54793367 | 3.12969470  | 0.48770585  |
| P  | 0.37594081  | -1.27462019 | 2.21238451  |
| H  | 0.79566196  | -2.60569218 | 2.38137010  |
| H  | 0.95145885  | -0.67514636 | 3.34792047  |
| H  | -0.96226804 | -1.37467741 | 2.63629571  |
| P  | 0.82168787  | 3.32734312  | 0.36229046  |
| H  | 0.49436451  | 4.67595901  | 0.15736741  |
| H  | 1.63564335  | 3.39419959  | 1.50340149  |
| H  | 1.69191192  | 3.01634919  | -0.68558616 |

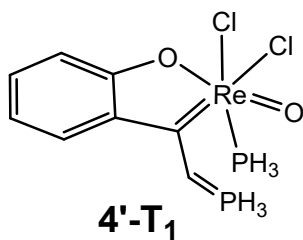

**0 3**

**E = -2143.681963 a.u.**

|    |             |             |             |
|----|-------------|-------------|-------------|
| Re | 0.73883476  | -0.24568425 | -0.12194192 |
| Cl | 2.29688029  | -2.07697851 | -0.31314675 |
| Cl | 0.77929051  | 0.24865728  | -2.39423397 |
| O  | -0.86895521 | -1.42893848 | -0.15336952 |
| O  | 1.67480193  | 1.15866628  | 0.53586875  |
| C  | -0.87202995 | 1.13312302  | 0.17594997  |
| C  | -2.09270770 | -0.88912982 | -0.10797326 |
| C  | -2.17649113 | 0.50443805  | 0.08414377  |
| C  | -3.44094903 | 1.10360379  | 0.16913590  |
| H  | -3.52343094 | 2.17406397  | 0.31789232  |
| C  | -4.48029676 | -1.04904692 | -0.13862989 |
| H  | -5.38118106 | -1.64467638 | -0.23045712 |
| C  | -3.24507151 | -1.67083436 | -0.21642686 |
| H  | -3.15193722 | -2.73853688 | -0.36779317 |
| C  | -4.58477316 | 0.33364851  | 0.05673477  |
| H  | -5.56125373 | 0.79779934  | 0.11639091  |
| C  | -0.63229022 | 2.45058482  | 0.34846939  |
| H  | -1.40917668 | 3.20725490  | 0.40086785  |
| P  | 0.79296202  | -1.03243178 | 2.29565541  |
| H  | 0.45487071  | -2.37423169 | 2.52563512  |
| H  | 2.04544938  | -0.94968808 | 2.92393383  |
| H  | -0.00990838 | -0.39765382 | 3.26534357  |
| P  | 1.02251628  | 3.11869830  | 0.36375830  |
| H  | 0.66411607  | 4.49600141  | 0.27584270  |
| H  | 1.78848504  | 3.22853216  | 1.52972607  |
| H  | 1.84516461  | 3.07877224  | -0.76588756 |

## References

- [1] Gaussian 16, Revision A.03, M. J. Frisch, G. W. Trucks, H. B. Schlegel, G. E. Scuseria, M. A. Robb, J. R. Cheeseman, G. Scalmani, V. Barone, G. A. Petersson, H. Nakatsuji, X. Li, M. Caricato, A. V. Marenich, J. Bloino, B. G. Janesko, R. Gomperts, B. Mennucci, H. P. Hratchian, J. V. Ortiz, A. F. Izmaylov, J. L. Sonnenberg, D. Williams-Young, F. Ding, F. Lipparini, F. Egidi, J. Goings, B. Peng, A. Petrone, T. Henderson, D. Ranasinghe, V. G. Zakrzewski, J. Gao, N. Rega, G. Zheng, W. Liang, M. Hada, M. Ehara, K. Toyota, R. Fukuda, J. Hasegawa, M. Ishida, T. Nakajima, Y. Honda, O. Kitao, H. Nakai, T. Vreven, K. Throssell, J. A. Montgomery, Jr., J. E. Peralta, F. Ogliaro, M. J. Bearpark, J. J. Heyd, E. N. Brothers, K. N. Kudin, V. N. Staroverov, T. A. Keith, R. Kobayashi, J. Normand, K. Raghavachari, A. P. Rendell, J. C. Burant, S. S. Iyengar, J. Tomasi, M. Cossi, J. M. Millam, M. Klene, C. Adamo, R. Cammi, J. W. Ochterski, R. L. Martin, K. Morokuma, O. Farkas, J. B. Foresman, and D. J. Fox, Gaussian, Inc., Wallingford CT, 2016.
- [2] a) A. D. Becke, *J. Chem. Phys.* 1993, **98**, 5648-5652; b) B. Miehlich, A. Savin, H. Stoll, H. Preuss, *Chem. Phys. Lett.* 1989, **157**, 200-206; c) C. Lee, W. Yang, R. G. Parr, *Phys. Rev. B.* 1988, **37**, 785-789.
- [3] a) F. Weigend, R. Ahlrichs, *Phys. Chem. Chem. Phys.* 2005, **7**, 3297–3305; b) F. Weigend, *Phys. Chem. Chem. Phys.* 2006, **8**, 1057-1065.
- [4] P. J. Hay, W. R. Wadt, *J. Chem. Phys.* 1985, **82**, 299-310.
- [5] a) P. v. R. Schleyer, C. Maerker, A. Dransfeld, H. Jiao, N. J. R. v. E. Hommes, *J. Am. Chem. Soc.* 1996, **118**, 6317-6318; b) Z. Chen, C. S. Wannere, C. Corminboeuf, R. Puchta, P. v. R. Schleyer, *Chem. Rev.* 2005, **105**, 3842-3888; c) H. Fallah-Bagher-Shaidaei, C. S. Wannere, C. Corminboeuf, R. Puchta, P. v. R. Schleyer, *Org. Lett.* 2006, **8**, 863-866.
- [6] a) R. Herges and D. Geuenich, *J. Phys. Chem. A* 2001, **105**, 3214-3220; b) D. Geuenich, K. Hess, F. Kçhler and R. Herges, *Chem. Rev.* 2005, **105**, 3758-3772.
- [7] a) H. Fliegl, S. Taubert, O. Lehtonen and D. Sundholm, *Phys. Chem. Chem. Phys.*, 2011, **13**, 20500–20518; b) D. Sundholm, H. Fliegl and R. J. F. Berger, *WIREs Comput. Mol. Sci.*, 2016, **6**, 639–678.
- [8] D. W. Szczepanik, RunEDDB, available at: <http://eddb.pl/runeddb/>.
- [9] D. W. Szczepanik, M. Andrzejak, K. Dyduch, E. Zak, M. Makowski, G. Mazur and J. Mrozek, *Phys. Chem. Chem. Phys.* 2014, **16**, 20514-20523.
